# Supplementary material for: Glycerol Monolaurate Inhibits Wild-Type African Swine Fever Virus Infection in Porcine Macrophages
Source: MDPI journal article supplement (doi:10.3390/pathogens12101193), 2023-09-25
Supplement: s1 [file s1]

## Supplementary Materials

### Glycerol Monolaurate Inhibits Wild-Type African Swine Fever Virus Infection in Porcine Macrophages

Joshua A. Jackman<sup>1,\*</sup>, Erik Arabyan<sup>2</sup>, Hovakim Zakaryan<sup>2</sup> and Charles C. Elrod<sup>3,4,\*</sup>

<sup>1</sup> School of Chemical Engineering and Translational Nanobioscience Research Center, Sungkyunkwan University, Suwon, 16419, Republic of Korea

<sup>2</sup> Laboratory of Antiviral Drug Discovery, Institute of Molecular Biology of NAS, Yerevan, Armenia; erik.arabyan.bio@gmail.com (E.A.); h\_zakaryan@mb.sci.am (H.Z.)

<sup>3</sup> Natural Biologics Inc., Newfield, NY, 14867, USA

<sup>4</sup> Department of Animal Science, Cornell University, Ithaca, NY, 14853, USA

\* Correspondence: jjackman@skku.edu (J.A.J.) and cce1@cornell.edu (C.C.E.)

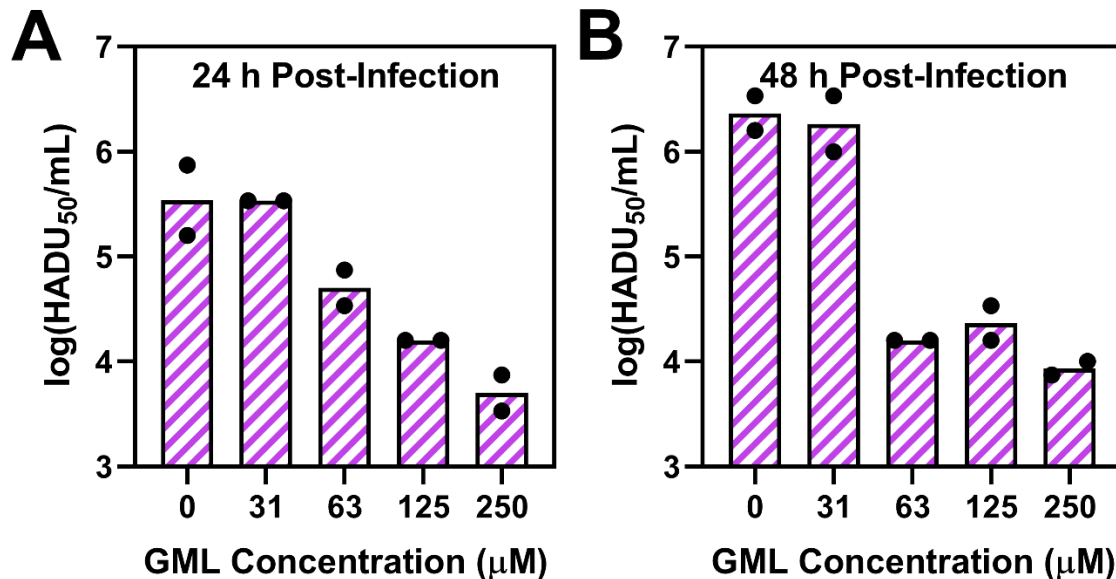

**Figure S1. Antiviral activity of GML to inhibit Armenia/07 ASFV infection of porcine macrophages *in vitro* at higher multiplicity of infection.** The virus suspension (MOI: 1 HADU<sub>50</sub> per well) was treated with different concentrations of GML (31-250  $\mu\text{M}$ ) prior to PAM cell infection. The 0  $\mu\text{M}$  GML data point corresponds to the virus-only control. Viral titers of cell culture supernatants were measured (A) 24 h or (B) 48 h post-infection by hemadsorption assay. Data are reported in units of  $\log$  50% hemadsorption doses (HADU<sub>50</sub>) per mL and presented as mean from two independent experiments (n = 2 per group). The dots correspond to individual data points.
